# Supplementary material for: Coal Fly Ash Derived NaX Zeolite for Arid-Soil Water Retention: A Kinetic and Performance Study
Source: Research Square preprint supplement (doi:10.21203/rs.3.rs-8067024/v1), 2025-11-20
Supplement: Supplementary file 1 [file 92065096017e0cd0e311b173.docx]

### *Supplementary Information*

## Coal Fly Ash Derived NaX Zeolite for Arid-Soil Water Retention: A Kinetic and Performance Study

**Guohui HE1,2, ZHANG Yu1,2*****, Jiti Zhou1,2**

Key Laboratory of Industrial Ecology and Environmental Engineering, School of Environmental Science and Technology, Dalian University of Technology, Dalian 116024, China

*Corresponding author(s). E-mail(s):zhangyu@dlut.edu.cn;

Contributing authors:2862014452@mail.dlut.edu.cn;

**Table S1** Quality changes of soil samples with different mixing ratios

| No. | Dry Weight（g） | D1（g） | D2（g） | D3（g） | D4（g） | D5（g） |
| --- | --- | --- | --- | --- | --- | --- |
| CK-1 | 122.40 | 172.61 | 162.70 | 152.46 | 142.74 | 124.41 |
| CK-2 | 122.42 | 172.21 | 159.21 | 145.81 | 134.95 | 127.53 |
| CK-3 | 123.43 | 172.54 | 163.21 | 152.08 | 141.67 | 127.14 |
| EG1-1 | 124.03 | 176.15 | 166.12 | 155.96 | 142.98 | 135.30 |
| EG1-2 | 123.82 | 177.23 | 165.75 | 156.11 | 144.67 | 135.63 |
| EG1-3 | 122.58 | 176.18 | 164.70 | 153.45 | 143.86 | 131.54 |
| EG2-1 | 123.43 | 178.04 | 164.90 | 155.23 | 146.88 | 140.68 |
| EG2-2 | 124.46 | 179.31 | 166.88 | 156.27 | 147.95 | 141.30 |
| EG2-3 | 123.82 | 178.30 | 167.70 | 156.53 | 146.45 | 140.80 |
| EG3-1 | 124.43 | 188.90 | 180.01 | 171.87 | 162.26 | 151.59 |
| EG3-2 | 123.72 | 187.42 | 179.92 | 170.07 | 160.09 | 150.86 |
| EG3-3 | 122.65 | 186.21 | 178.31 | 169.44 | 159.13 | 148.51 |
| EG4-1 | 123.93 | 189.40 | 180.44 | 171.19 | 162.21 | 153.69 |
| EG4-2 | 123.14 | 189.34 | 180.93 | 172.09 | 161.44 | 152.57 |
| EG4-3 | 122.18 | 188.18 | 181.51 | 172.36 | 160.10 | 150.17 |

(Note: CK denotes "Control Check", with the numbering indicating three parallel control samples; EG denotes "Experimental Group", with the numbering indicating different zeolite-to-soil ratios and three parallel experimental replicates for each ratio. D1-D5 represent the sample mass measured on days 1 to 5.)

**Table S2** Water-Retention Metrics for Each Treatment : Maximum Water-Holding Capacity, Daily Water Retention R(t)

| Group | Zeolite content（%） | Δm (g, mean ± SD) | R(1)(%) | R(2)mean±SD (%) | R(3)mean±SD (%) | R(4)mean±SD (%) | R(5)mean±SD (%) |
| --- | --- | --- | --- | --- | --- | --- | --- |
| CK | 0 | 49.70 ± 0.56 | 100.00 | 78.38 ± 3.91 | 55.06 ± 7.04 | 34.27 ± 8.06 | 7.27 ± 3.14 |
| EG1 | 5 | 53.04 ± 0.81 | 100.00 | 79.28 ± 1.28 | 59.77 ± 1.93 | 38.37 ± 1.77 | 20.15 ± 2.98 |
| EG2 | 10 | 54.65 ± 0.19 | 100.00 | 77.94 ± 2.36 | 58.76 ± 1.12 | 42.43 ± 0.78 | 31.15 ± 0.44 |
| EG3 | 15 | 63.97 ± 0.46 | 100.00 | 87.34 ± 1.03 | 73.32 ± 0.48 | 57.72 ± 0.84 | 41.81 ± 1.00 |
| EG4 | 20 | 65.91 ± 0.39 | 100.00 | 87.83 ± 1.85 | 74.05 ± 1.92 | 57.93 ± 0.51 | 44.11 ± 1.55 |

**Fig.S1** XRD patterns and SEM images of NaX zeolite synthesized under different synthesis conditions. The figure shows representative phase compositions (XRD) and corresponding morphologies (SEM) for various NaOH/CFA ratios, liquid-to-solid ratios, and crystallization times.

| 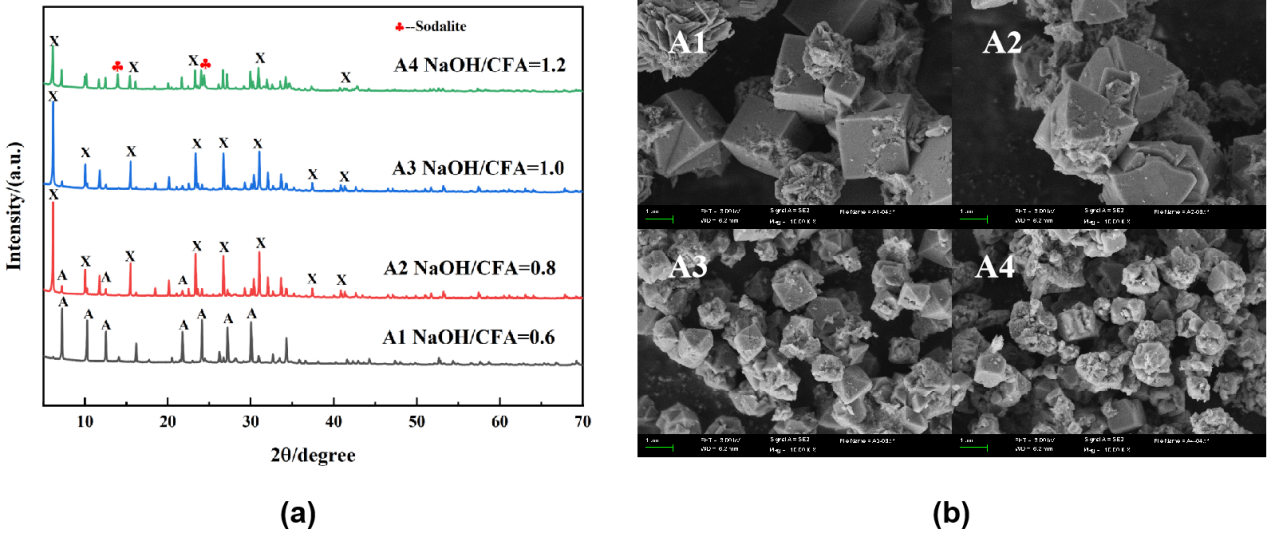 |
| --- |
| 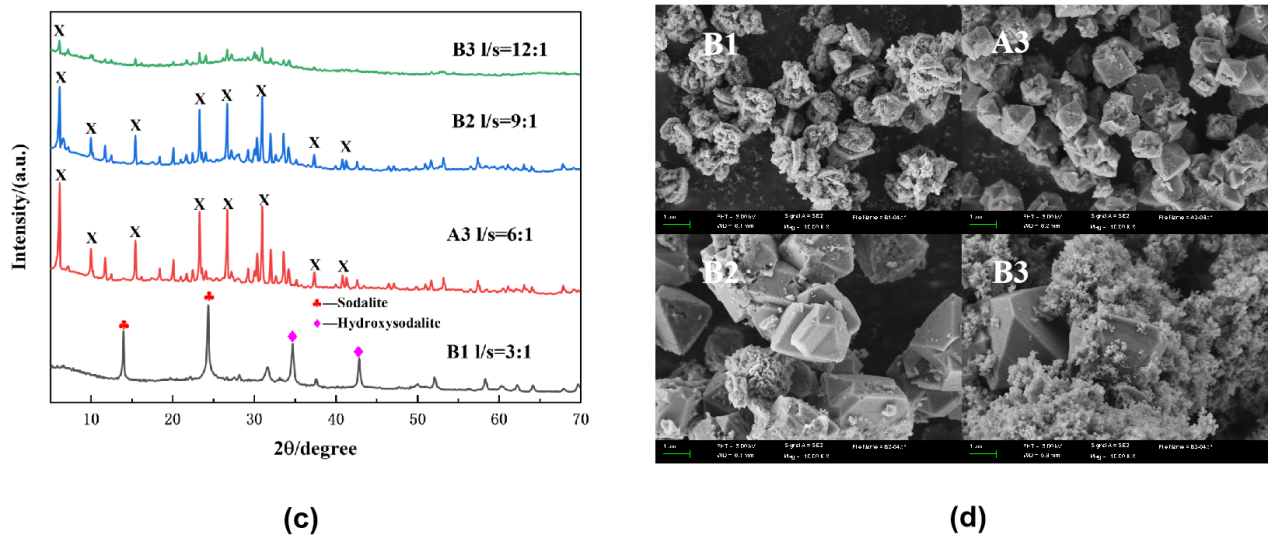 |
| 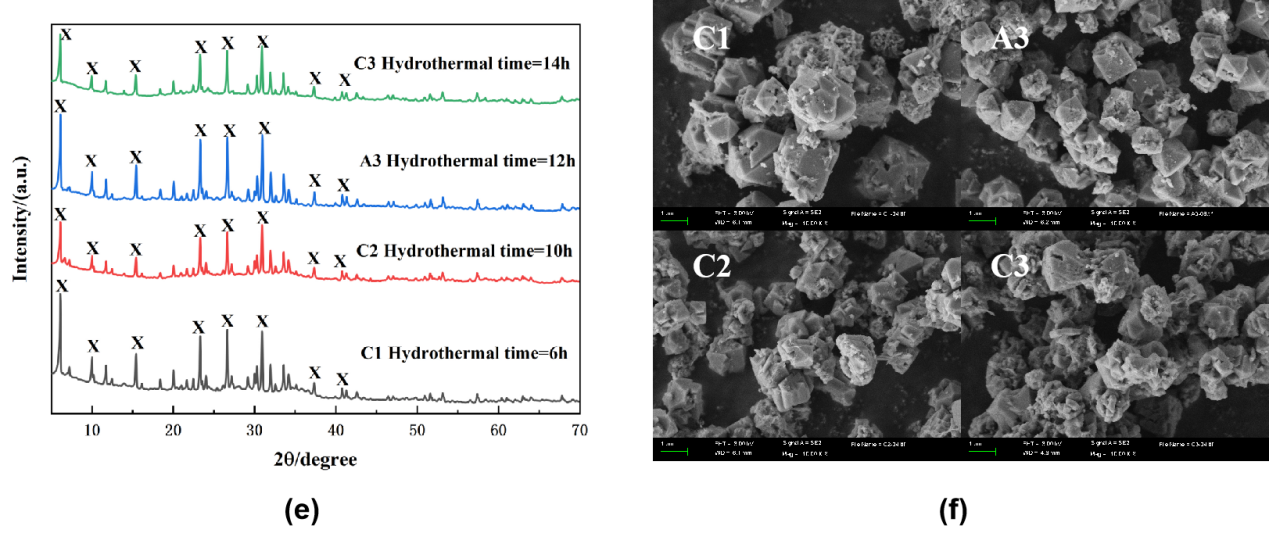 |

**Fig S1.**XRD images of Zeolites Synthesized from Fly Ash via Alkaline Fusion: (a) Alkali-to-Ash Ratios; (c) Liquid-to-Solid Ratios; (e)Crystallization Times. SEM images of Zeolites Synthesized from Fly Ash via Alkaline Fusion:(b) Alkali-to-Ash Ratios; (d) Liquid-to-Solid Ratios; (f)Crystallization Times.

**Table S3**. Synthesis conditions and phase characteristics of NaX zeolite from CFA

| Run ID | NaOH/CFA (mass ratio) | L/S ratio | Time (h) | Dominant phase (XRD) | Secondary phase | SEM note (morphology) | Remark |
| --- | --- | --- | --- | --- | --- | --- | --- |
| A1 | 0.6 | 6:1 | 12 | LTA | – | cubic LTA | low FAU yield |
| A2 | 0.8 | 6:1 | 12 | LTA+FAU | FAU minor | mixed cubic + octahedral | transition regime |
| A3 (optimum) | 1.0 | 6:1 | 12 | FAU-NaX | – | well-defined FAU octahedra | optimum condition |
| A4 | 1.2 | 6:1 | 12 | FAU+SOD | SOD | dense sodalite coating | excess alkali favors SOD |
| A5 | 1.0 | 9:1 | 12 | Weak FAU | hydrosodalite | incomplete FAU, amorphous residues | dilution effect at high L/S |
| B1 | 1.0 | 6:1 | 6 | Weak FAU | – | incomplete FAU crystals | insufficient crystallization |
| B2 | 1.0 | 6:1 | 10 | FAU-NaX | – | well-formed FAU octahedra | good crystallinity |
| B3 | 1.0 | 6:1 | 14 | FAU aggregated | SOD minor | aggregated FAU particles | over-crystallization, aggregation |
| C1 | 1.0 | 3:1 | 12 | SOD | hydrosodalite | dense sodalite coating | low water, favors SOD |
| C2 | 1.0 | 9:1 | 12 | FAU weak | – | incomplete FAU morphology | dilution weakens OH- |
| C3 | 1.0 | 12:1 | 12 | FAU weak | amorphous | poor crystallinity, amorphous particles | excess water suppresses FAU |

S3.5.2 Data and Methodology

The single-exponential model is:

By taking the natural logarithm of both sides:

let , and perform a regression of , yielding:

where and *lnRi* are the values for each data point.

The logarithmic model is:

We again use least squares regression to fit *,* and perform a regression of, yielding*:*

where and *Ri* are the values for each data point.

For the bi-exponential model, to ensure global optimization of parameter fitting and avoid local minima, a grid search strategy was employed over [0.01,2.0] for(***k1***,***k2***) (with the constraint ***k1***>***k2***）,For each given(***k1***,***k2***) , the closed-form estimatewas used to minimize the sum of squared errors (***SSE***). The parameter set yielding the smallest SSE was selected as optimal:

where ***SST*** is the total sum of squares of the relative water retention rate

Root mean square error:

Mean absolute error:

Calculate the small-sample corrected information criteria:

where ***n*** is the number of observed data points (excluding the water retention rate recorded on the first day; for each sample treatment, ***n***=4), and ***p*** denotes the number of model parameters (single-exponential model:***p***=1;logarithmic model: ***p***=1;bi-exponential model: ***p***=3). Lower AIC/BIC values indicate a better model fit.

****Table S4** Summary of derived parameters under the optimal model**

| Group | Zeolite content(%) | Parameters | t1/2(d) | t20(d) | p |
| --- | --- | --- | --- | --- | --- |
| CK | 0 | B=107.90，b=55.26 | 2.6549 | 4.7695 | 0.420 |
| EG1 | 5 | A=103.83,k=0.33 | 2.1195 | 4.9214 | 0.322 |
| EG2 | 10 | A=101.26,k=0.28 | 2.4428 | 5.6720 | 0.253 |
| EG3 | 15 | A=103.12,k=0.20 | 3.4998 | 8.1263 | 0.194 |
| EG4 | 20 | A=102.97,k=0.19 | 3.6295 | 8.4274 | 0.184 |
